# Supplementary material for: Arabidopsis phenotyping reveals the importance of alcohol dehydrogenase and pyruvate decarboxylase for aerobic plant growth
Source: PubMed Central journal article supplement (PMC7542448; doi:10.1038/s41598-020-73704-x), 2020-10-07
Supplement: 41598_2020_73704_MOESM1_ESM.pdf [file 41598_2020_73704_MOESM1_ESM.pdf]

**Arabidopsis phenotyping reveals the importance of ALCOHOL DEHYDROGENASE and PYRUVATE DECARBOXYLASE for aerobic plant growth**

Irene Ventura, Luca Brunello, Sergio Iacopino, Maria Cristina Valeri, Giacomo Novi, Tino Dornbusch, Pierdomenico Perata, Elena Loreti

**Supplementary Information**

**Supplemental Table S1:** List of haar-like features used for the machine-learning algorithm from the OpenCV library.

| <b>Color channel</b> | <b>Feature Name</b> | <b>Type</b> | <b>feature size</b> | <b>calculation</b> |
|----------------------|---------------------|-------------|---------------------|--------------------|
| <b>Red</b>           | haar_6              | Block       | 8                   | Sum                |
| <b>Red</b>           | haar_8              | Block       | 8                   | Sum                |
| <b>Red</b>           | haar_9              | Block       | 8                   | Sum                |
| <b>Red</b>           | haar_10             | Block       | 8                   | Sum                |
| <b>Red</b>           | haar_11             | Block       | 8                   | Sum                |
| <b>Red</b>           | haar_12             | Block       | 8                   | Sum                |
| <b>Red</b>           | haar_13             | Block       | 8                   | Sum                |
| <b>Red</b>           | haar_17             | Line        | 1x3                 | Sum                |
| <b>Red</b>           | haar_17             | Line        | 4x12                | Sum                |
| <b>Green</b>         | Haar_5              | Block       | 15                  | Sum                |
| <b>Green</b>         | Haar_5              | Block       | 30                  | Sum                |
| <b>Green</b>         | Haar_10             | Block       | 15                  | Sum                |
| <b>Green</b>         | Haar_10             | Block       | 30                  | Sum                |
| <b>Green</b>         | Haar_12             | Block       | 15                  | Sum                |
| <b>Green</b>         | Haar_12             | Block       | 30                  | Sum                |

1. **Supplemental Table S2:** list of texture features used following Laws 1980 (Laws, K. I. Textured image segmentation (No. USCIP-940). University of Southern California Los Angeles Image Processing INST. (1980) taken from the OpenCV library.

| <b>Color channel</b> | <b>Feature name</b> | <b>Block size</b> |
|----------------------|---------------------|-------------------|
| Red                  | E5E5                | 15x15             |
| Red                  | E5L5                | 15x15             |
| Red                  | E5R5                | 15x15             |
| Red                  | L5S5                | 15x15             |
| Red                  | L5R5                | 15x15             |
| Red                  | L5S5                | 15x15             |
| Red                  | R5E5                | 15x15             |
| Red                  | R5L5                | 15x15             |
| Red                  | R5R5                | 15x15             |
| Red                  | R5S5                | 15x15             |
| Red                  | S5E5                | 15x15             |
| Red                  | S5L5                | 15x15             |
| Red                  | S5R5                | 15x15             |
| Red                  | S5S5                | 15x15             |

**Supplemental Table S3.** List of primers.

| <b>Gene (AGI)</b>                    | <b>Forward primer</b>       | <b>Reverse primer</b>            |
|--------------------------------------|-----------------------------|----------------------------------|
| <i>At4g05320</i><br>( <i>UBQ10</i> ) | GGCCTTGTATAATCCCTGATGAATAAG | AAAGAGATAACAGGAACGGAAACATAG<br>T |
| <i>At1g77120</i> ( <i>ADH</i> )      | CAATTGCTGGACTGCAAAGGTG      | AGCAACTCTTTGCTCGTATCATCC         |
| <i>At4g33070</i> ( <i>PDC1</i> )     | CAATTGCTGGACTGCAAAGGTG      | AGCAACTCTTTGCTCGTATCATCC         |
| <i>AT5G54960</i> ( <i>PDC2</i> )     | CCCCAAATCCGCAGTAGAGT        | CCTCAAGGGGACACACATTT             |
| <i>AT1G01480</i><br>( <i>ACS2</i> )  | ATGGGTCTTGCAGAGAATCAGC      | ACCTTCAAGGGTGCAAATAGAAGC         |
| AT2G19590<br>( <i>ACO1</i> )         | ACCTCAGATGCAGATTGGGAAAGC    | CCATCGTCTTGCTGAGTTCCTCTG         |

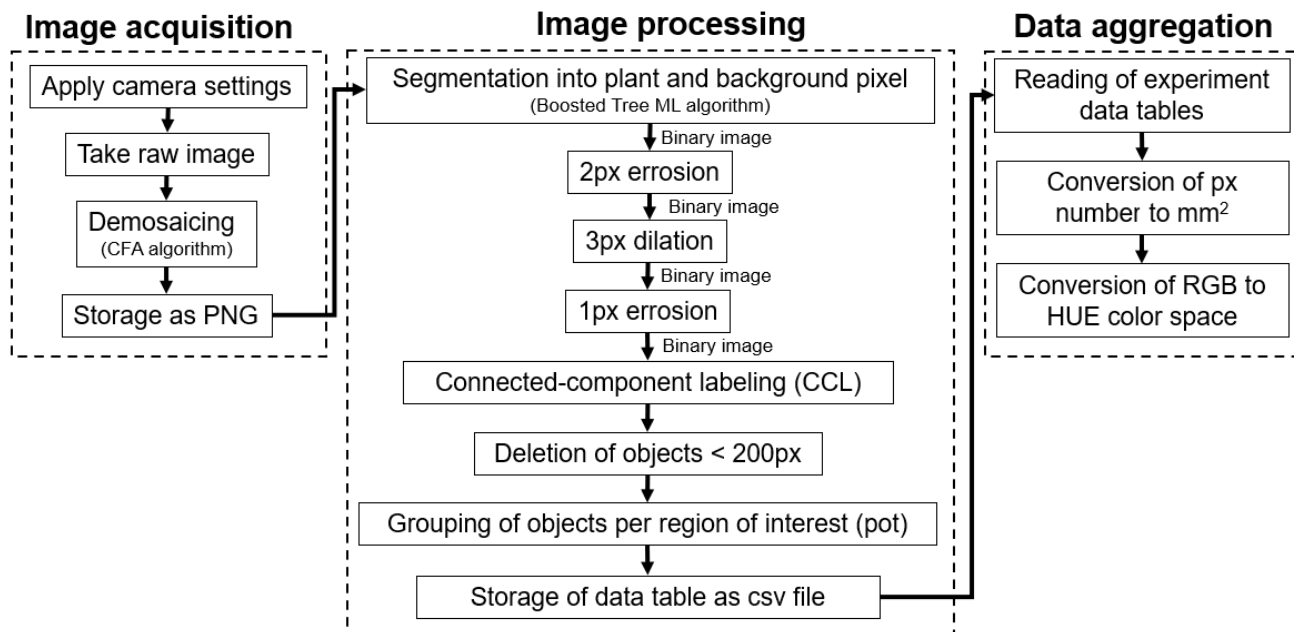

**Figure S1.** Scheme illustrating the main steps of a phenotyping workflow to generate standardised output results.

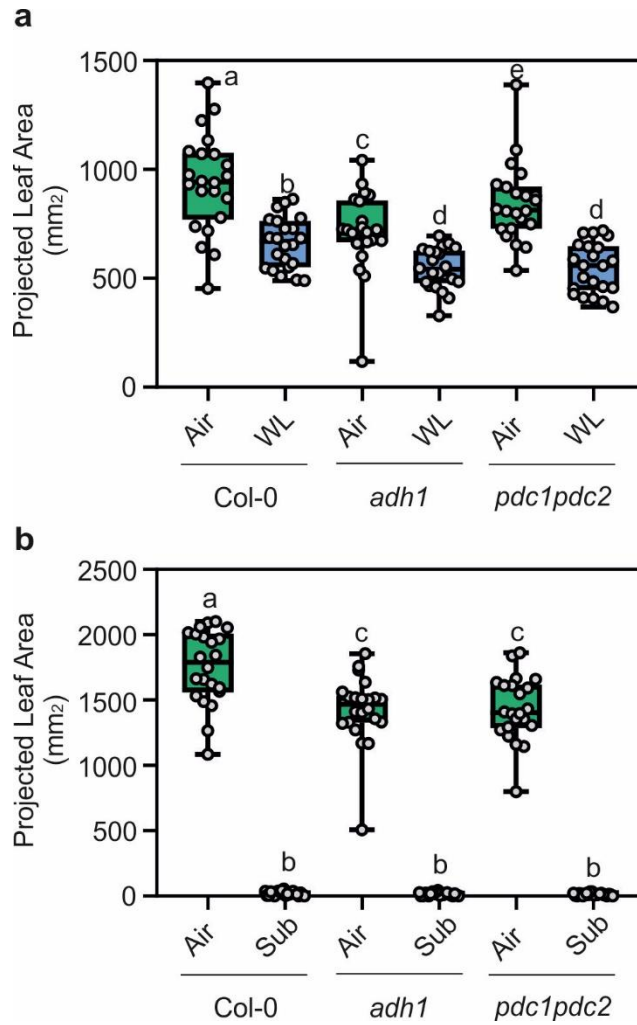

**Figure S2.** Effect of waterlogging and submergence on plant size in separate, independent experiments. **(a)** Plant size (Projected Leaf Area) in aerobic plants (green box) compared to plants that were waterlogged (blue box). Data were taken at day 28. **(b)** Plant size (Projected Leaf Area) in aerobic plants (green box) compared to plants that were submerged (blue box). Data were taken at day 33. The experimental set-up is the same as in Figures 4 and 6.

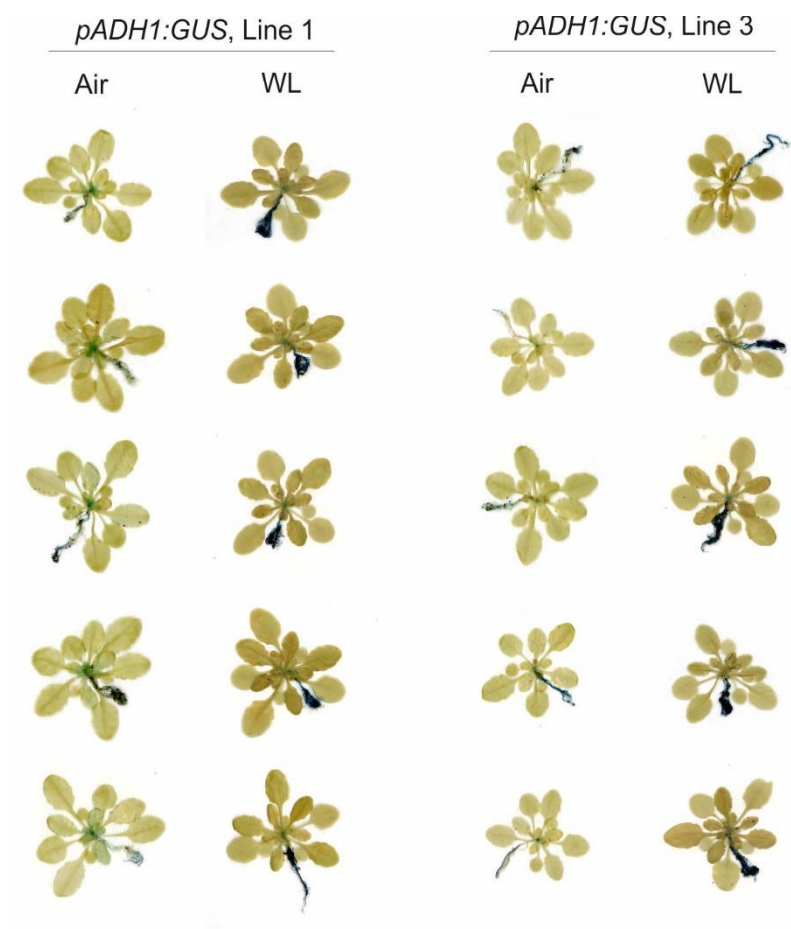

**Figure S3.** GUS staining of *pADH1:GUS* plants in air or 5-days waterlogging in two independent transgenic lines. The experimental set-up is the same as in Figure 7a.

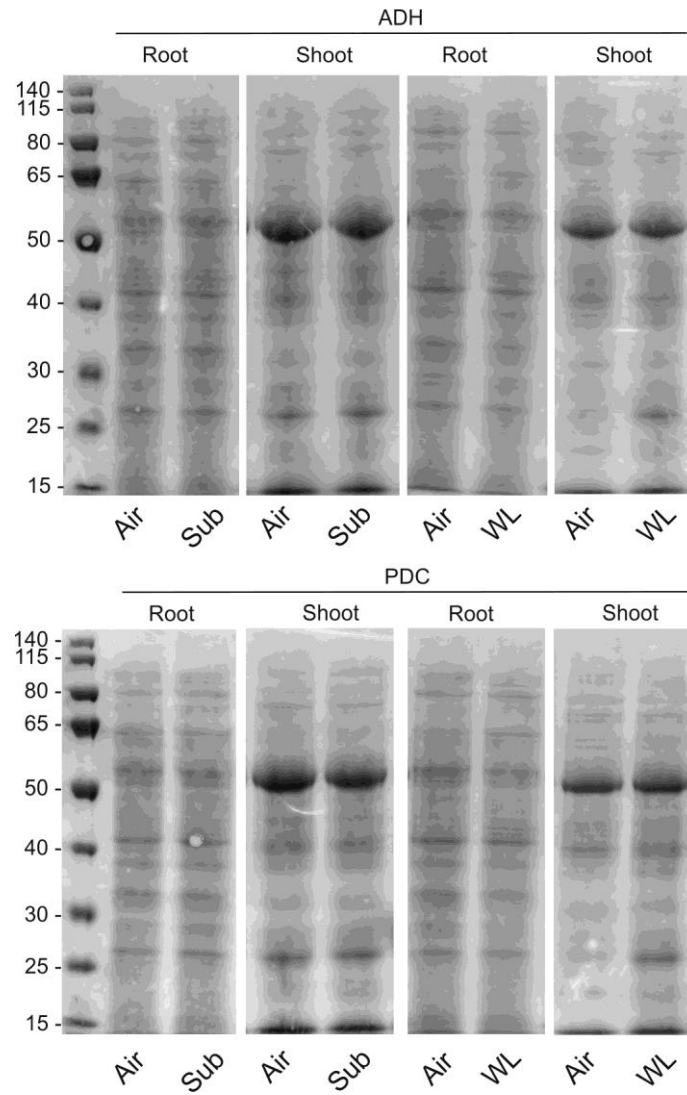

**Figure S4.** Gel staining with Amido Black demonstrating equal loading in the SDS-PAGE utilized for the western-blot shown in Figures 7 and 8.



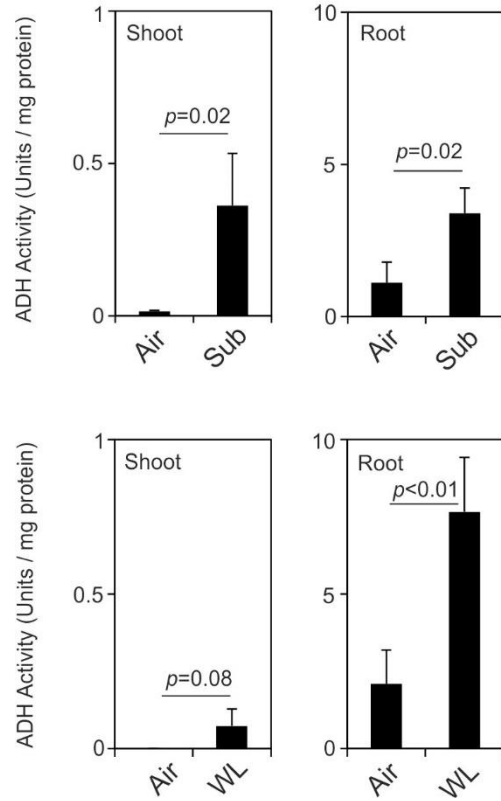

**Figure S5.** Activity of ADH in the samples utilized for the western-blot shown in Figures 7 and 8. One unit is the amount of enzyme leading to a change in A340 of 0.1 in one minute.



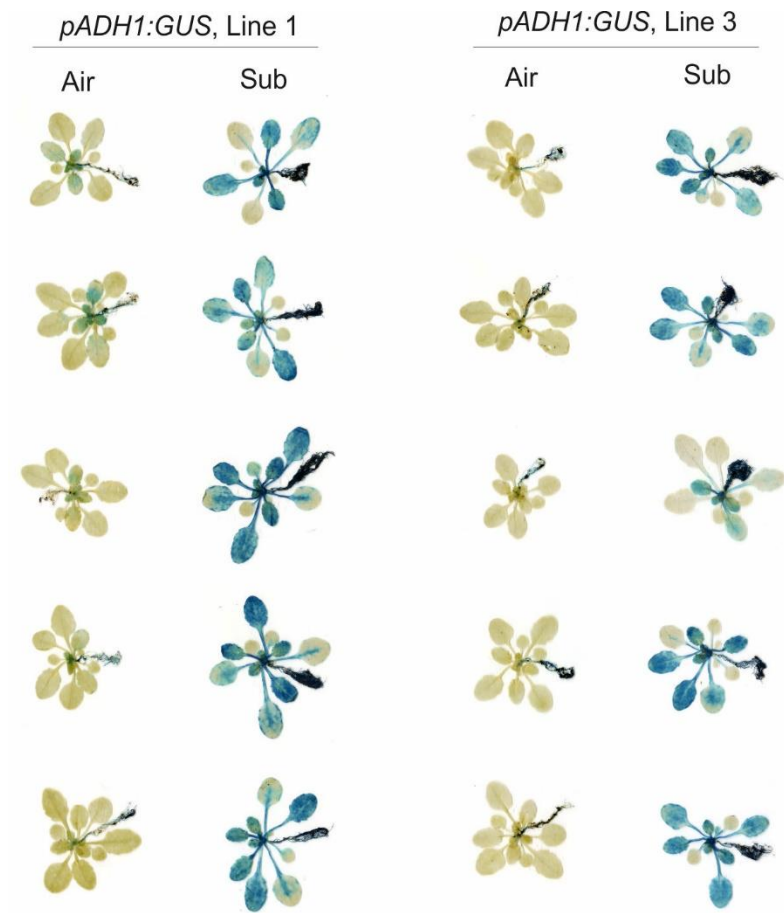

**Figure S7.** GUS staining of *pADH1:GUS* plants in air or 5-days waterlogging in two independent transgenic lines. The experimental set-up is the same as in Figure 8a.

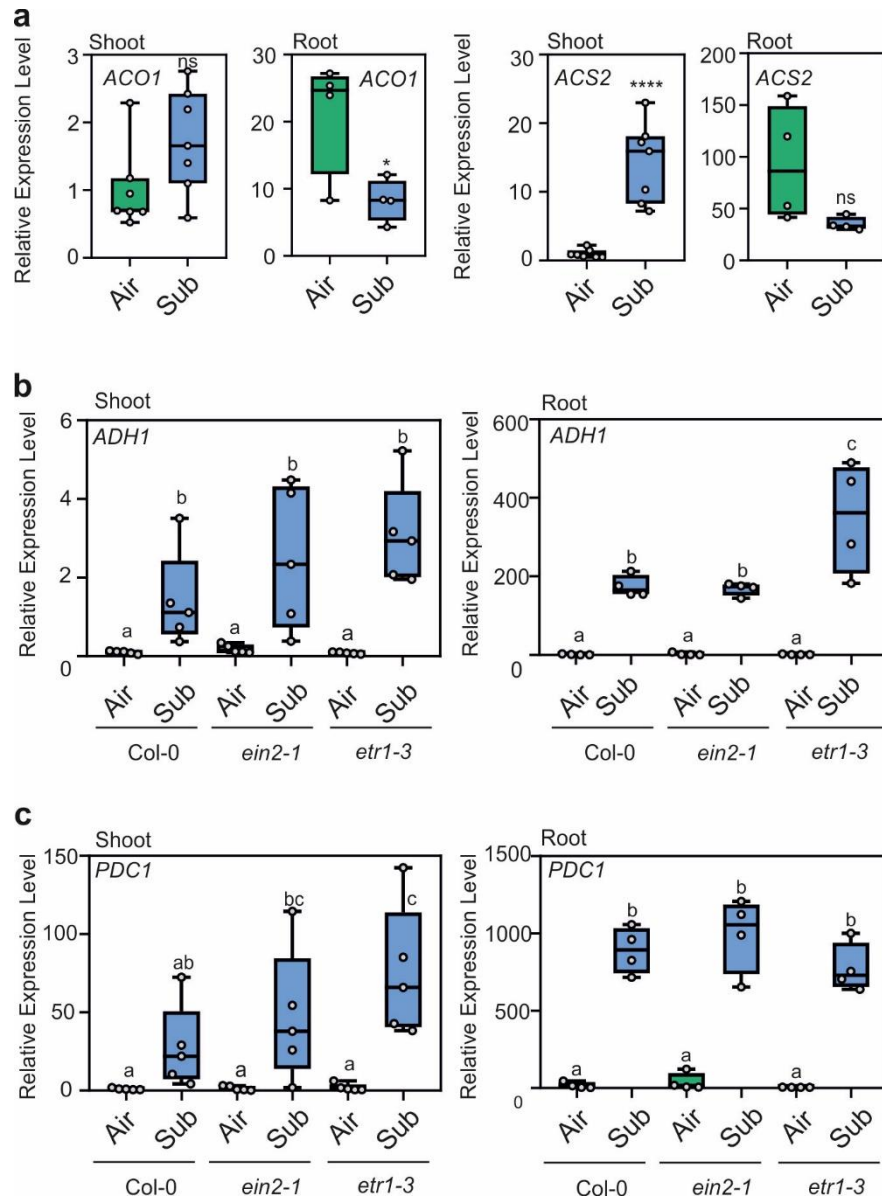

**Figure S8.** Role of ethylene in the induction of *ADH1* and *PDC1* in submerged plants. **(a)** Induction (RT-qPCR) of *ACO1* and *ACS2* by 35h submergence; Statistically significant differences is indicated by the asterisk (T-test, pairwise comparison at each time point,  $*=p<0.05$ ;  $**=p<0.01$ ;  $***=p<0.001$ ;  $****=p<0.0001$ ). **(b)** Expression of *ADH1* in aerobic (air) and 35h submerged (Sub) plants. The genotypes used are shown in figure. Different letters indicate statistically significant differences (two-way ANOVA). **(c)** Expression of *PDC1* in aerobic (air) and submerged (Sub) plants. The genotypes used are shown in figure. Different letter indicates statistically significant differences (ANOVA).

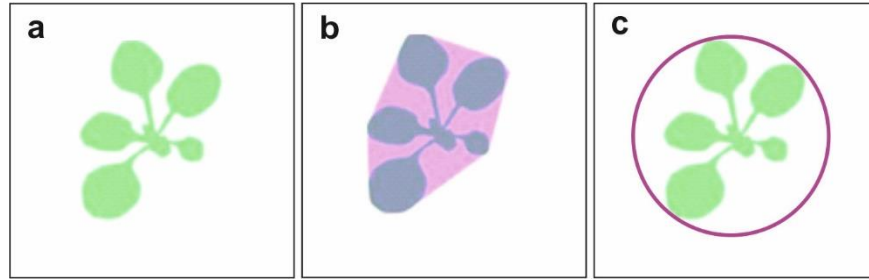

**Figure S9.** Description of the phenotypic parameters measured. **(a)** Projected Leaf Area: area of the rosette. **(b)** Compactness: Rosette Area/Conhull area. **(c)** Rosette Area / Area of min enclosing circle.
